# Supplementary material
Source: publisher site journal article supplement (https://www.dovepress.com/get_supplementary_file.php?f=513153.docx)
Supplement: Supplementary file 1 [file get_supplementary_file.php]

**Supplementary information**

# Different properties of the erector spinae and multifidus muscles on physical performance in patients with chronic obstructive pulmonary disease

# *Kyosuke Imashiro1,2, Masanori Nakanishi3, Yuta Minoshima1,2, Ken Kouda2, Seigo Sasaki4, Koichiro Takahashi5, Kazuhisa Asai6, Tsunahiko Hirano7, Kazuto Matsunaga7, Yoshiaki Minakata4*

**Supplementary Figures**

**
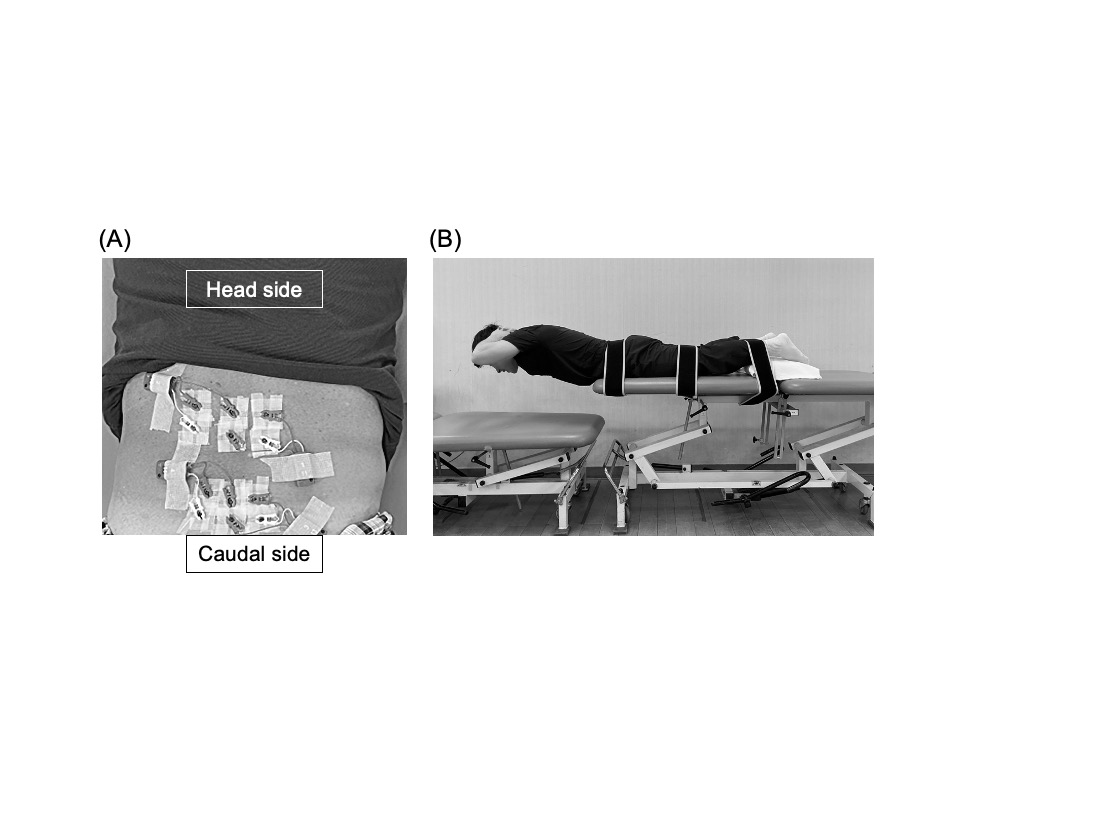
**

**Figure S1.** Trunk holding test.

(A) Attaching the electrodes, (B) Implementation of the trunk holding test.

**
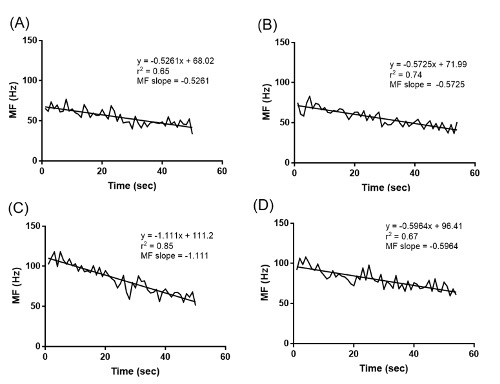
**

**Figure S2.** Typical example of MF slope

(A) Erector spinae muscle in patients with COPD, (B) erector spinae muscle in healthy subjects, (C) multifidus muscle in patients with COPD, (D) multifidus muscle in healthy subjects. **Abbreviation:** MF slope, median frequency slope.


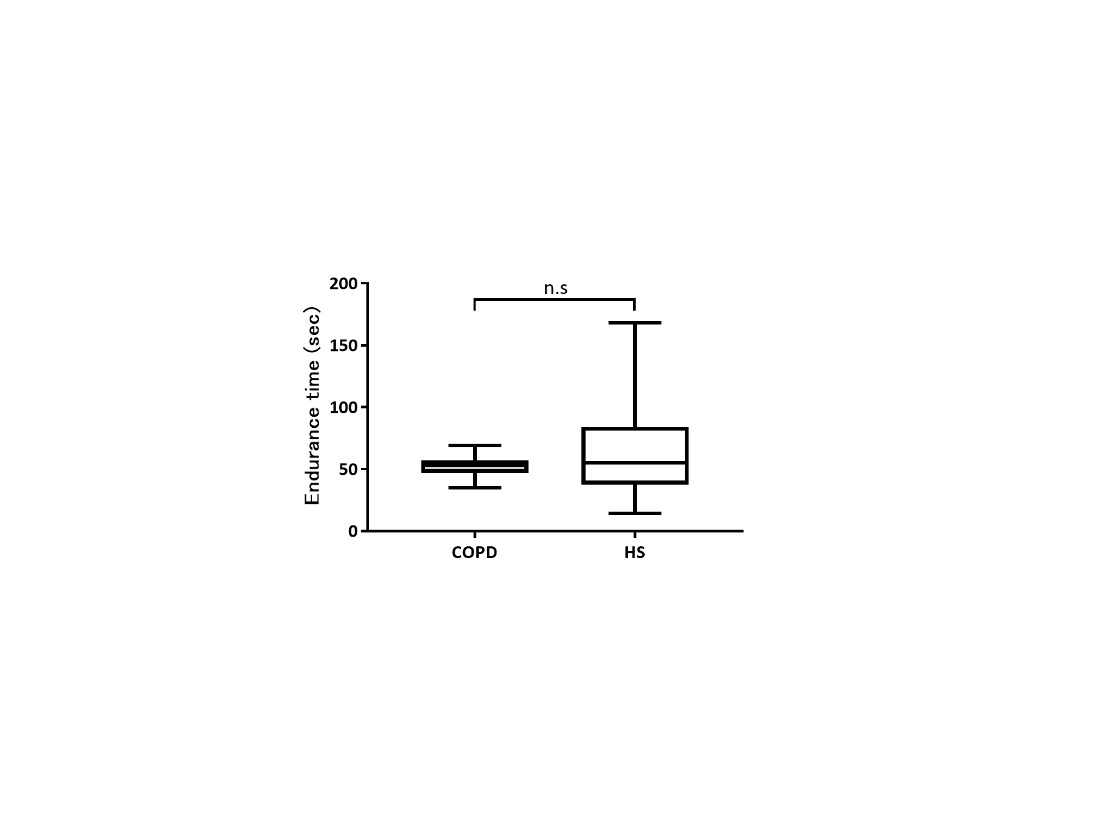


**Figure S3.** A comparison of the endurance time in the trunk holding test.

**Abbreviations:** HS, healthy subjects. n.s., not significant.
